# Supplementary material for: Male-Type Depression Mediates the Relationship between Avoidant Coping and Suicidal Ideation in Men
Source: MDPI journal article supplement (doi:10.3390/ijerph191710874), 2022-08-31
Supplement: s1 [file s1]

### **Supplement S1: Demographic questions**

**Q:** What is your age in years? Please just write the number.

**Response option(s):** [Numeric text]

**Q:** How would you describe your current place of residence?

**Response option(s):**

- ☐ Metropolitan
- ☐ Regional
- ☐ Rural or remote

**Q:** What state/territory do you live in?

**Response option(s):**

- ☐ Western Australia
- ☐ Queensland
- ☐ Northern Territory
- ☐ South Australia
- ☐ New South Wales
- ☐ Victoria
- ☐ Tasmania
- ☐ Australian Capital Territory
- ☐ Jervis Bay Territory

**Q:** What is your postcode?

**Response option(s):** [Numeric text]

**Q:** What is your current employment status?

**Response option(s):**

- ☐ Employed full time
- ☐ Employed part time
- ☐ Employed casually
- ☐ Unemployed, looking for work
- ☐ Unemployed, not looking for work
- ☐ Retired
- ☐ Student

**Q:** What is your highest level of completed education?

**Response option(s):**

- ☐ Some high school
- ☐ Trade/certificate/diploma
- ☐ High school
- ☐ Undergraduate degree
- ☐ Postgraduate degree

**Q:** What is your current income range? (Australian dollars)

**Response option(s):**

- ☐ \$0 - \$49,999 per year (1)
- ☐ \$50,000 - \$99,999 per year (2)
- ☐ \$100,000 - \$149,999 per year (3)
- ☐ \$150,000 - \$199,999 per year (4)
- ☐ \$200,000 + per year (5)

**Q:** What is your gender?

**Response option(s):**

- ☐ Male
- ☐ Another gender: [Free text response]

**Q:** Do you identify as transgender?

**Response option(s):**

- ☐ Yes
- ☐ No

**Q:** How would you best describe your sexual orientation?

**Response option(s):**

- ☐ Straight
- ☐ Gay
- ☐ Bisexual
- ☐ Other: [Free text response]

**Q:** What is your current relationship status?

**Response option(s):**

- ☐ Single/never married
- ☐ Partnered
- ☐ Married / de facto
- ☐ Single, separated / divorced
- ☐ Widowed
- ☐ Other: [Free text response]

**Q:** What category best describes your current living situation?

**Response option(s):**

- ☐ Single person living alone
- ☐ Non-related adults sharing a home
- ☐ Couple living with no children
- ☐ Couple with dependent children living at home (dependent defined as financially or physically dependent)
- ☐ Single parent with dependent children living at home
- ☐ Single person living with extended family ( with or without children)
- ☐ Couple living with extended family ( with or without children)
- ☐ Other, please specify: [Free text response]

**Q:** Do you identify as Aboriginal or Torres Strait Islander?

**Response option(s):**

- ☐ No
- ☐ Yes - Aboriginal
- ☐ Yes - Torres Strait Islander
- ☐ Both Aboriginal and Torres Strait Islander

**Q:** How would you describe your cultural/ethnic background?

**Response option(s):** [Free text response]

**Q:** What country were you born in?

**Response option(s):**

- ☐ Australia
- ☐ Somewhere else: [Free text response]

**Supplement S2: COVID-19 pandemic stressors questions**

**Q:** To what extent has the COVID-19 pandemic put financial stress on you?

**Response option(s):**

1. No Stress
2. A little stress
3. Moderate Stress
4. Considerable Stress
5. Extreme Stress

**Q:** How have government COVID-19 restrictions affected your mental health?

**Response option(s):**

1. Very positively
2. Somewhat positively
3. Not at all
4. Somewhat negatively
5. Very negatively

**Supplement S3: Mediation analysis without covariates**

**Supplementary Table S1.** Mediation model assessing the mediating role of male-type depression in the relationship between avoidant coping and suicidal/self-harm ideation ( $n=606$ )

|                                                    | $\beta$ | $B$ ( $SE$ ) | 99% CI  | T      | $p$   |
|----------------------------------------------------|---------|--------------|---------|--------|-------|
| Direct effect of AC on SI/SHI                      | 0.27    | .06 (.01)    | .03-.08 | 5.831  | <.001 |
| Total effect of AC on SI/SHI                       | 0.44    | .09 (.01)    | .07-.11 | 12.129 | <.001 |
| Indirect effect of AC on SI/SHI (via MDRS-7 score) | 0.18    | .03 (.01)    | .02-.06 |        |       |

*Note.* Boldface text indicates statistically significant values at  $p<.01$ , AC = avoidant coping, SI/SHI = suicidal ideation/self-harm ideation,  $\beta$  = standardised coefficient,  $B$  = unstandardised coefficient,  $SE$  = standard error, CI = confidence interval.
